# Supplementary material for: Comprehensive Assessment of Medial Knee Joint Instability by Valgus Stress MRI
Source: MDPI journal article supplement (doi:10.3390/diagnostics11081433), 2021-08-09
Supplement: s1 [file s1]

## Supplementary Material

### Title: Comprehensive Assessment of Medial Knee Joint Instability by Valgus Stress MRI

**Authors:** Malin Ciba, Eva-Maria Winkelmeier, Justus Schock, Philipp Schad, Niklas Kotowski, Teresa Nolte, Lena Marie Wollschläger, Matthias Knobe, Andreas Prescher, Christiane Kuhl, Daniel Truhn, Sven Nebelung

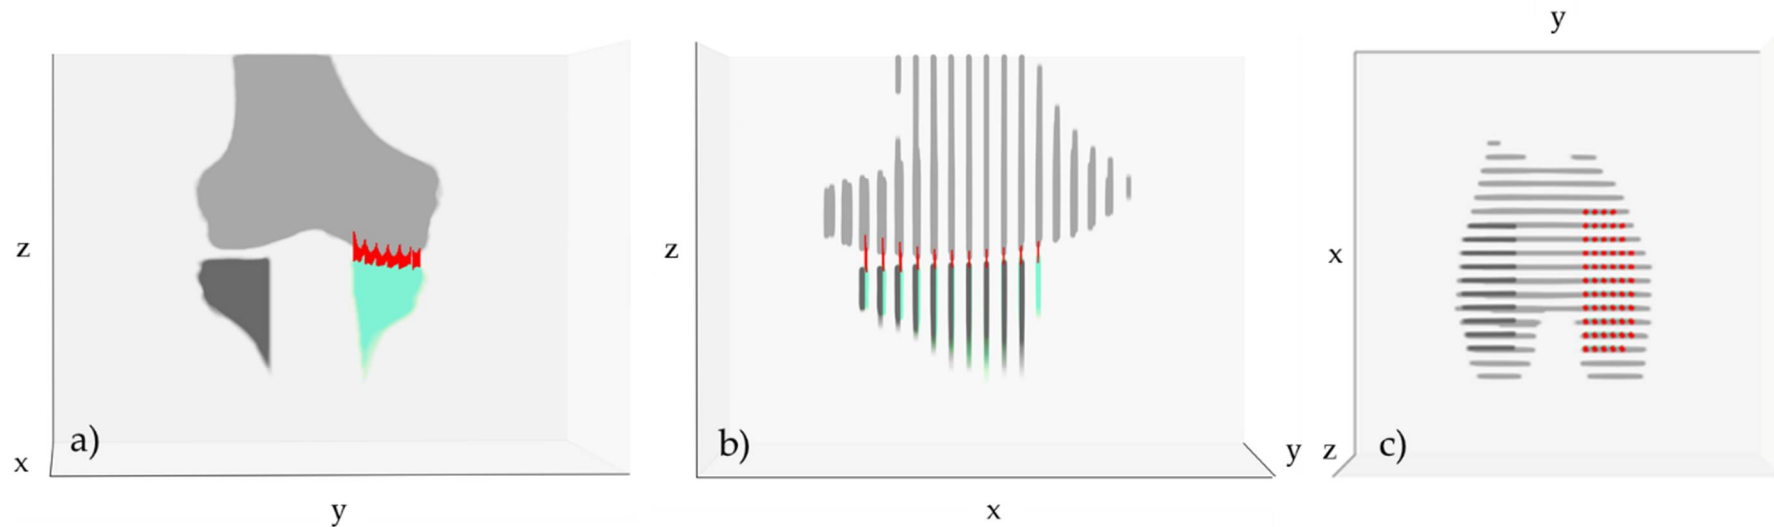

**Supplementary Figure S1: Visualization of the 3D joint model and subchondral cortical distances.** Based on manual segmentations of femur (light grey) and tibia (dark grey [lateral condyle]; turquoise [medial condyle]), 3D joint models were implemented for each joint, configuration, and condition. Subchondral cortical distances were determined at closely spaced intervals along the tibial plateau. The 3D model was considered as a Cartesian coordinate system in which the x-axis indicates the anteroposterior, the y-axis the mediolateral, and the z-axis the craniocaudal dimension. Accordingly, the y-z-plane represents the coronal plane (a), the x-z-plane the sagittal plane (b), and the x-y-plane the axial plane of the acquired MR images (c). A grid with fixed spacing of 3.3 mm (along x) and 3.5 mm (along y) was defined for the medial compartment of each joint, configuration, and condition. Originating from each grid point, represented by red dots (c), grid lines, represented by red lines (a, b), were computed parallel to the z-axis, and measured in length between both cortical bone outlines. Sliced appearance of femur and tibia (b, c) is due to interslice gaps after reconstruction.

**Supplementary Table S1: Post-hoc details of pairwise comparisons of absolute manual 2D and computed 3D measurements of subchondral cortical distances (SCDs).** The manual 2D measurements of the two readers were pooled. Following repeated measures two-way ANOVA, Tukey's multiple comparisons test was performed to assess significant differences between selected loading configurations and joint conditions. This selection was performed to reduce the number of comparisons. The family-wise alpha threshold was set to  $p \leq .01$ . ns – non-significant, otherwise please refer to **Table 2** for details on abbreviations.

| Tukey's post-hoc test               |                                                                                 | SCD <sub>mean</sub> | SCD <sub>ml1</sub> | SCD <sub>ml2</sub> | SCD <sub>ml3</sub> | SCD <sub>ap1</sub> | SCD <sub>ap2</sub> | SCD <sub>ap3</sub> |
|-------------------------------------|---------------------------------------------------------------------------------|---------------------|--------------------|--------------------|--------------------|--------------------|--------------------|--------------------|
| <b>Manual 2D<br/>Measurements</b>   | Intact UL vs. intact LO                                                         | -                   | 0.003              | ns                 | ns                 | 0.003              | 0.004              | ns                 |
|                                     | intact UL vs. partially sMCL-deficient UL                                       | -                   | ns                 | ns                 | ns                 | ns                 | ns                 | ns                 |
|                                     | intact UL vs. completely sMCL-deficient UL                                      | -                   | ns                 | ns                 | ns                 | ns                 | ns                 | ns                 |
|                                     | intact UL vs. completely sMCL- and ACL-deficient UL                             | -                   | 0.008              | ns                 | ns                 | ns                 | ns                 | ns                 |
|                                     | intact LO vs. partially sMCL-deficient LO                                       | -                   | 0.002              | 0.003              | ns                 | ns                 | <0.001             | ns                 |
|                                     | intact LO vs. completely sMCL-deficient LO                                      | -                   | <0.001             | <0.001             | <0.001             | <0.001             | <0.001             | <0.001             |
|                                     | intact LO vs. completely sMCL- and ACL-deficient LO                             | -                   | <0.001             | <0.001             | <0.001             | <0.001             | <0.001             | 0.001              |
|                                     | partially sMCL-deficient UL vs. partially sMCL-deficient LO                     | -                   | <0.001             | 0.001              | 0.001              | <0.001             | <0.001             | ns                 |
|                                     | partially sMCL-deficient UL vs. completely sMCL-deficient UL                    | -                   | ns                 | ns                 | ns                 | ns                 | ns                 | ns                 |
|                                     | partially sMCL-deficient UL vs. completely sMCL- and ACL-deficient UL           | -                   | ns                 | ns                 | ns                 | ns                 | ns                 | ns                 |
|                                     | partially sMCL-deficient LO vs. completely sMCL-deficient LO                    | -                   | <0.001             | <0.001             | <0.001             | <0.001             | <0.001             | <0.001             |
|                                     | partially sMCL-deficient LO vs. completely sMCL- and ACL-deficient LO           | -                   | <0.001             | <0.001             | <0.001             | <0.001             | <0.001             | 0.002              |
|                                     | completely sMCL-deficient UL vs. completely sMCL-deficient LO                   | -                   | <0.001             | <0.001             | <0.001             | <0.001             | <0.001             | <0.001             |
|                                     | completely sMCL-deficient UL vs. completely sMCL- and ACL-deficient UL          | -                   | ns                 | ns                 | ns                 | ns                 | ns                 | ns                 |
|                                     | completely sMCL-deficient LO vs. completely sMCL- and ACL-deficient LO          | -                   | 0.007              | 0.007              | ns                 | 0.003              | 0.003              | ns                 |
|                                     | completely sMCL- and ACL-deficient UL vs. completely sMCL- and ACL-deficient LO |                     | <0.001             | <0.001             | <0.001             | <0.001             | <0.001             | <0.001             |
| <b>Computed 3D<br/>Measurements</b> | Intact UL vs. intact LO                                                         | <0.001              | 0.001              | 0.005              | ns                 | <0.001             | 0.006              | ns                 |
|                                     | intact UL vs. partially sMCL-deficient UL                                       | ns                  | ns                 | ns                 | ns                 | ns                 | ns                 | ns                 |
|                                     | intact UL vs. completely sMCL-deficient UL                                      | <0.01               | ns                 | ns                 | ns                 | ns                 | ns                 | ns                 |
|                                     | intact UL vs. completely sMCL- and ACL-deficient UL                             | ns                  | 0.007              | ns                 | ns                 | ns                 | ns                 | ns                 |
|                                     | intact LO vs. partially sMCL-deficient LO                                       | <0.001              | 0.002              | 0.004              | 0.004              | ns                 | 0.002              | ns                 |
|                                     | intact LO vs. completely sMCL-deficient LO                                      | <0.001              | <0.001             | <0.001             | <0.001             | <0.001             | <0.001             | 0.006              |
|                                     | intact LO vs. completely sMCL- and ACL-deficient LO                             | <0.001              | <0.001             | <0.001             | <0.001             | <0.001             | <0.001             | ns                 |
|                                     | partially sMCL-deficient UL vs. partially sMCL-deficient LO                     | <0.001              | <0.001             | 0.004              | ns                 | 0.003              | 0.004              | ns                 |

[illegible]
